# Supplementary material for: The Mechanism of PEDV-Carrying CD3+ T Cells Migrate into the Intestinal Mucosa of Neonatal Piglets
Source: PubMed Central journal article supplement (PMC8000367; doi:10.3390/v13030469), 2021-03-12
Supplement: viruses-13-00469-s001.pdf [file viruses-13-00469-s001.pdf]

## Supplementary Information

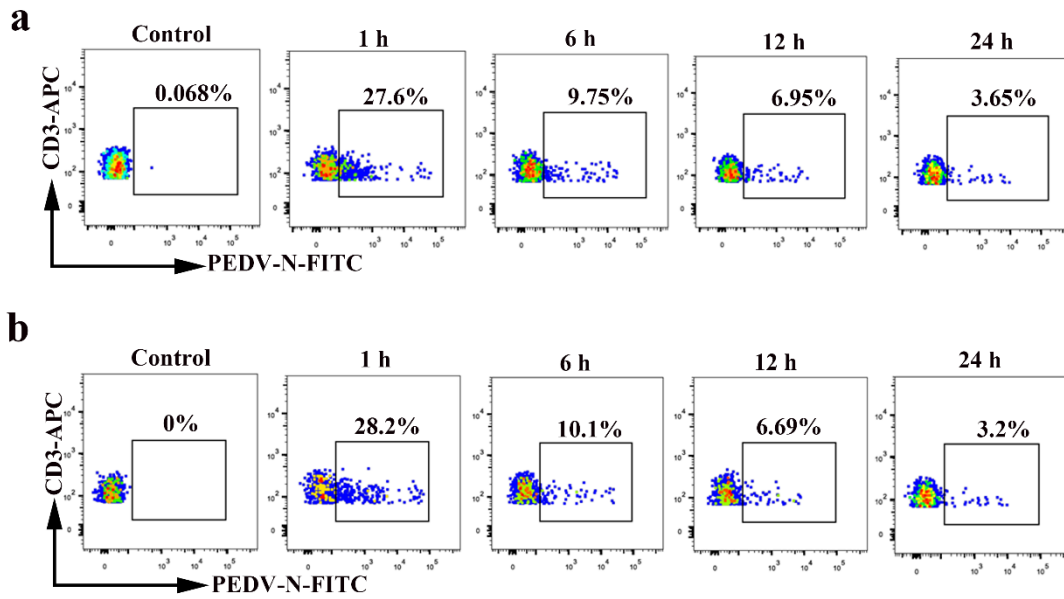

**Fig.1 PHA and IL-2-mediated stimulation of blood-derived CD3<sup>+</sup> T cells does not enhance susceptibility to PEDV infection.** Primary blood-derived CD3<sup>+</sup> T cells (a) or blood-derived CD3<sup>+</sup> T cells stimulated with PHA and IL-2 (b) were inoculated at an MOI of 0.1 with PEDV. Percentages of PEDV positive CD3<sup>+</sup> T cells were detected by FACS.

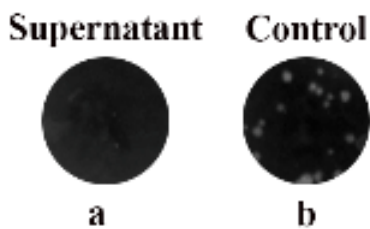

**Fig.2 The virus titer was detected by plaque assay**

a. Virus in the supernatant of blood-derived CD3<sup>+</sup> T cells infected PEDV at 1 h. b. PEDV as positive control
